# Supplementary material for: Photo- and electro-controllable 2D diffraction gratings prepared using electrohydrodynamic instability in a nematic polymerizable mixture
Source: Royal Society of Chemistry journal article supplement (doi:10.1039/d3tc01682j), 2023-01-01
Supplement: d3tc01682j1.pdf [file d3tc01682j1.pdf]

## SUPPORTING INFORMATION

### Photo- and electro-controllable 2D diffraction gratings prepared using electrohydrodynamic instability in nematic polymerizable mixture

Alexey Bobrovsky, Valery Shibaev, Boris Ostrovskii, Martin Cigl, Vera Hamplová, Alexej Bubnov

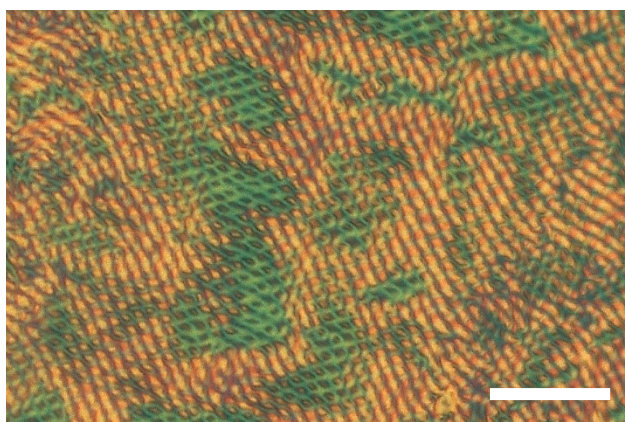

**Figure S1.** POM image of the mixture after photopolymerization under field 16 V. Scale is 50  $\mu\text{m}$

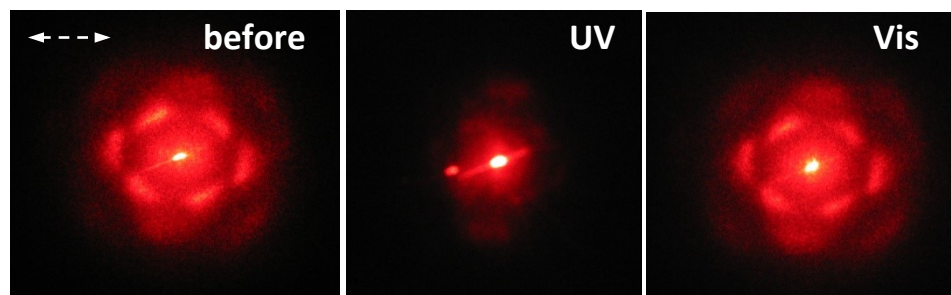

**Figure S2.** Diffraction patterns of HeNe laser for composite photochromic grating before, after UV irradiation (10 min, 382 nm,  $\sim 1 \text{ mW/cm}^2$ ) and after subsequent visible light action (1 min, 428 nm,  $\sim 10 \text{ mW/cm}^2$ ). Mixture was polymerized at 18 V.

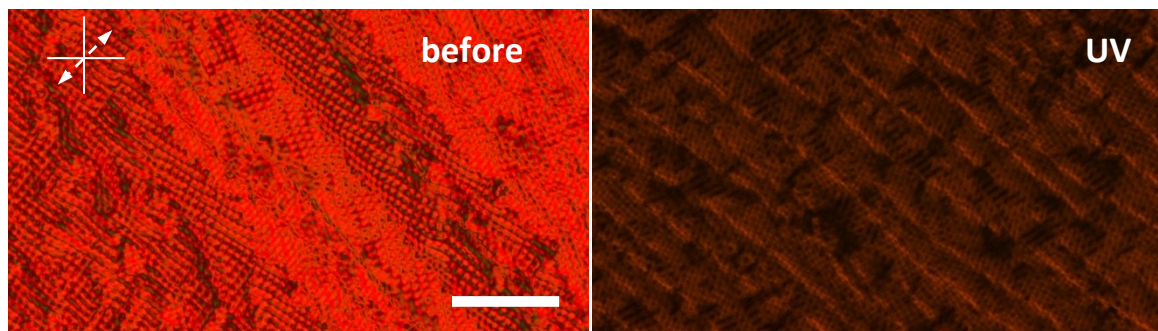

**Figure S3.** POM images of the photochromic grating before and after UV irradiation (4 min, 382 nm,  $\sim 1 \text{ mW/cm}^2$ ). Polymerization was performed under application 17 V field. Scale is 50  $\mu\text{m}$ .

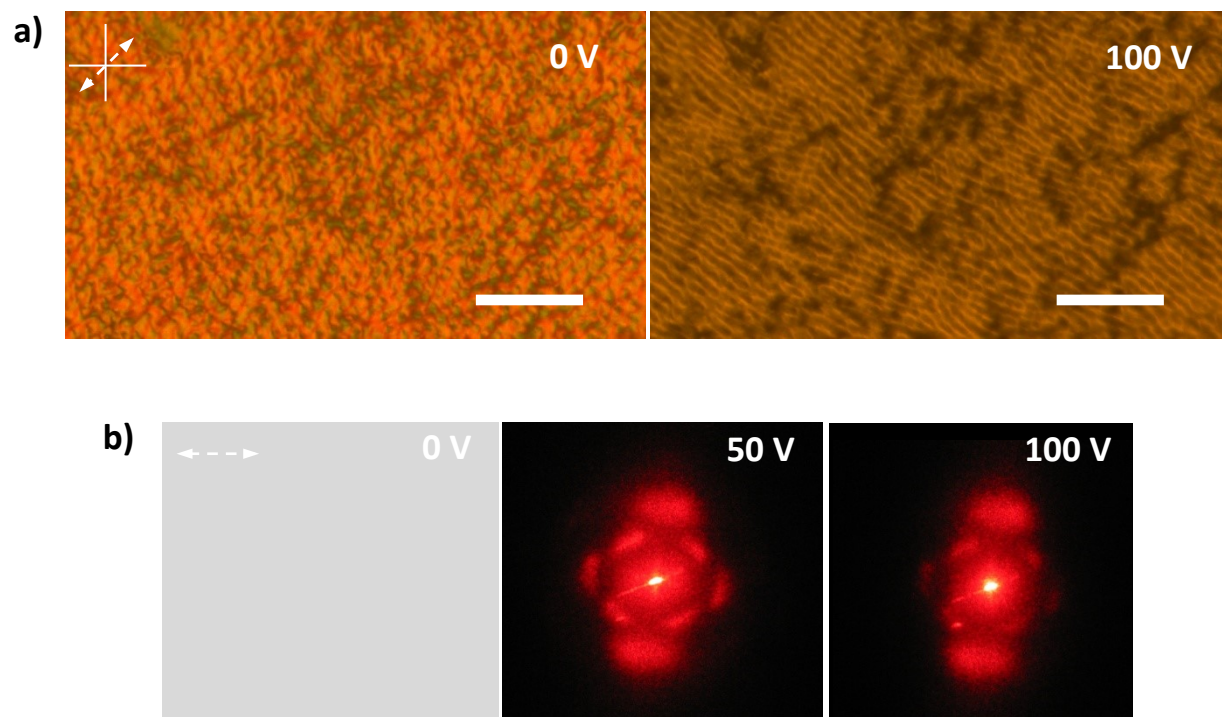

**Figure S4.** (a) POM images of the grating at different applied electric field (shown in figure). Mixture was polymerized at 18 V. (b) Diffraction patterns of HeNe laser for composite refilled with 5CB+6DABU at different electric field (1 kHz). Mixture was polymerized at 18 V. Scale is 50  $\mu\text{m}$ .

### Calculation of the interlayer distances

Interlayer distances  $d$  were calculated by determination of scattering angle  $\theta$  by the following equation (1):

$$\tan 2\theta = \frac{D}{2A}, \quad (1)$$

where  $D$  is the diameter of reflex on the flat screen,  $A$  is the distance between screen and sample.

Values of  $d$  were calculated as follows (2):

$$d = \frac{\lambda}{2\sin \theta}, \quad (2)$$

where  $\lambda$  is the light wavelength (0.633  $\mu\text{m}$  in our case).

### List of videos

**Video S1.** POM image of the nonpolymerized mixture under the gradual increase of the applied voltage from 0 V to 20 V.

**Video S2.** Switching of the diffraction pattern of photochromic composite DG under application of 100 V (1 kHz). (DG was prepared by polymerizing LC mixture at 18 V (50 Hz).

**Video S3.** Switching of the diffraction pattern of photochromic composite DG under application of 100 V (1 kHz). (DG was prepared by polymerizing LC mixture at 17 V (50 Hz).
